# Supplementary material for: A novel hydrothermal synthesis and characterisation of porous Mn3O4 for supercapacitors with high rate capability
Source: Royal Society of Chemistry journal article supplement (doi:10.1039/c4ra10175h), 2015-01-01
Supplement: c4ra10175h1.pdf [file c4ra10175h1.pdf]

## Supplementary Figures

Supplementary Figure S1

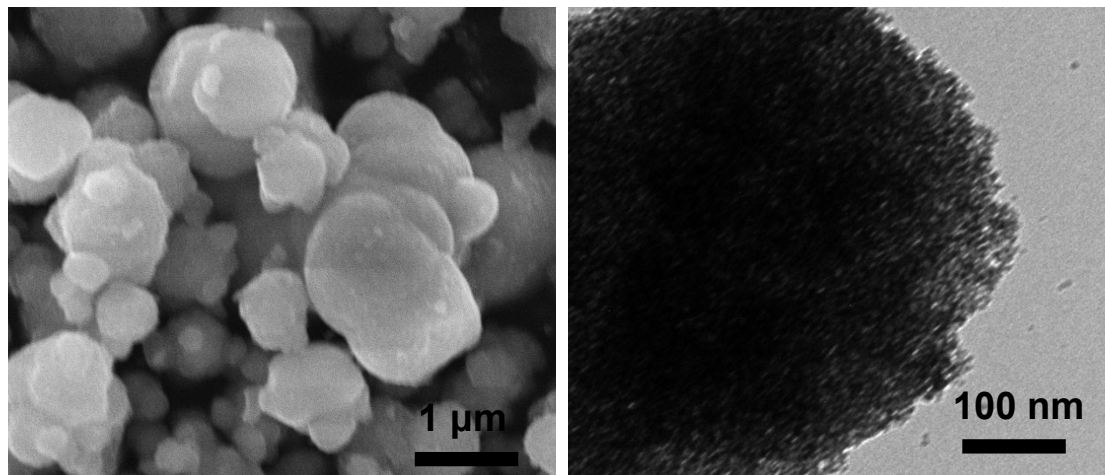

(a) SEM of WS- Mn<sub>3</sub>O<sub>4</sub> nanoparticles TEM (b) TEM images of WS-Mn<sub>3</sub>O<sub>4</sub> nanoparticles

Supplementary Figure S2

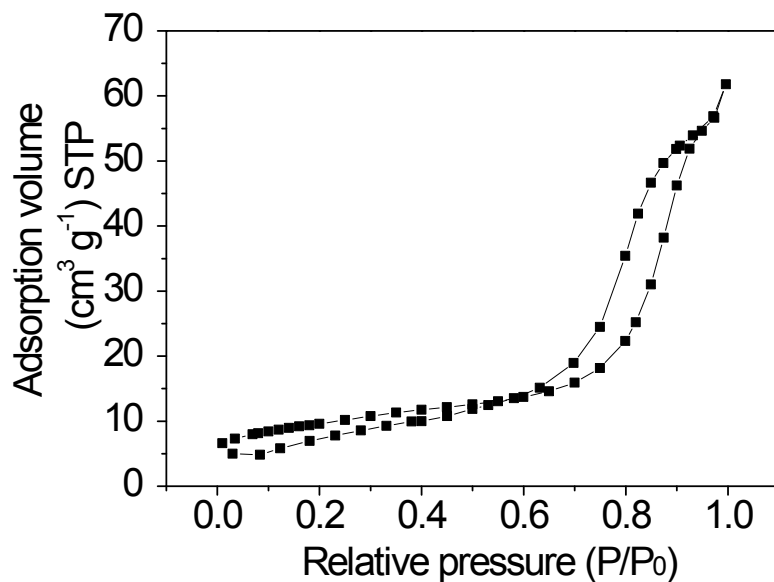

N<sub>2</sub> adsorption–desorption isotherms of synthesized WS-Mn<sub>3</sub>O<sub>4</sub>
